# Supplementary material for: Appropriate aggregation is needed for highly active Pt/Al2O3 to enable hydrogenation of chlorinated nitrobenzene
Source: Royal Society of Chemistry journal article supplement (doi:10.1039/d2cc00940d), 2022-01-01
Supplement: d2cc00940d1.pdf [file d2cc00940d1.pdf]

## Supporting information

# Proper aggregation needed as highly active Pt/Al<sub>2</sub>O<sub>3</sub> for hydrogenation of chloronitrobenzene

*Rongtian Gu, Deming Meng, Minyi She, Yibo Wang, Hua Yang, Xiangke Guo,  
Nianhua Xue, Weiping Ding\**

Key Lab of Mesoscopic Chemistry of Ministry of Education, School of Chemistry  
and Chemical Engineering, Nanjing University, Nanjing 210023, China

\*Email: [Dingwp@nju.edu.cn](mailto:Dingwp@nju.edu.cn)

## **Materials and Methods**

### **Synthesis of $\gamma$ -Al<sub>2</sub>O<sub>3</sub>**

Two types of alumina are used in this article. 1) A0: a commercial  $\gamma$ -Al<sub>2</sub>O<sub>3</sub> with mainly external {110} facet, obtained by the direct roasting dehydration of boehmite (Aluminum Corporation Shandong). 2) A1: a  $\gamma$ -Al<sub>2</sub>O<sub>3</sub> porous nanorods with higher energy {111} facet, synthesized using a method similar to our previous report<sup>1</sup>.

### **Synthesis of Pt<sub>1</sub>/A1**

The sample of Pt<sub>1</sub>/A1, with 0.8 wt.% platinum species dispersed atomically on the surface of the A1, was prepared by the incipient wetness impregnation method. Typically, 0.1 mL of aqueous hex-chloroplatinic acid solution (80 mg Pt/mL) was diluted to 0.65 mL using deionized water, then the solution was dropped into 0.992 g of corresponding A1 ( $\gamma$ -Al<sub>2</sub>O<sub>3</sub>{111}) powder, and kept the mixture at room temperature for 12 h before drying at 80°C. The as-prepared sample was grinded and calcined at 550 °C for 3 h in air.

### **Synthesis of Pt<sub>n</sub>/A1**

The Pt<sub>n</sub>/A1, with aggregated platinum particles supported on A1, was obtained by a similar treatment except that A1 was pretreated by olic acid (OA). Typically, dispersed 1g OA in 20 mL ethanol, then added 1 g A1 to the solution, stirred for 5 hours, filtered, washed with ethanol 3 times and dried at 80 °C to obtain OA-coated alumina (A1@OA). Then 0.8 wt.% Pt was impregnated on the A1@OA. Similarly, the as-prepared sample was calcined at 550 °C for 3 h in air.

The modification of A1 with OA here helps to weaken the interaction between platinum and support.

### **Synthesis of xPt/A1 and xPt/A0**

In addition to the above-mentioned A1 support, we also selected another alumina A0

( $\gamma$ -Al<sub>2</sub>O<sub>3</sub>{110}) with a different morphology and specific surface area as the support. A series of samples with different platinum content were also prepared by a similar impregnation method, denoted as xPt/A1(A0), where x represents the percentage of Pt mass content.

### **Instruments and measurements**

The content of platinum species was measured by inductively coupled plasma-atomic emission spectrometry (ICP-AES) method. The specific surface areas of catalysts were measured by N<sub>2</sub>-sorption at 77 K using Micromeritics ASAP 3020 apparatus and calculated by the Brunauer-Emmett-Teller (BET) method.

High resolution transmission electron microscopy (HRTEM) measurements were taken with a JEOL JEM-2100 instrument operated at 200 kV. The high angle annular dark field-scanning transition electron microscopy (HAADF-STEM) images were obtained using a FEI TITAN operated at 300 kV.

The X-ray diffraction (XRD) analyses were performed on a Phillips X'Pro diffractometer with Cu K $\alpha$  radiation operated at 40 kV and 40 mA.

The X-ray photoelectron spectroscopy (XPS) were conducted on a Thermo Scientific Escalab 250Xi system equipped with a monochromatic Al K $\alpha$  (h $\nu$  = 1486.6 eV) X-ray exciting source. The test spectra were corrected with binding energy of C 1s (284.6 eV).

The *in-situ* Fourier transform infrared (FTIR) of CO absorption was measured by a Bruker Tensor 27 infrared spectrophotometer. The catalysts were pretreated in pure Ar at 200 °C for 1 h to remove the water and other surface adsorbed species, and the IR background was collected after cooling to room temperature. Then 5 vol.% CO/Ar was introduced into the cell for 30 minutes to saturate the CO adsorption at room temperature (~ 20 °C). Subsequently, the atmosphere was switched to pure Ar to clear the physically adsorbed CO, and the IR spectra were recorded every 15 s

simultaneously until there was no signal for gas phase CO.

Hydrogen temperature-programmed reduction (H<sub>2</sub>-TPR) and CO temperature-programmed desorption (CO-TPD) experiments were performed using Xianquan 5000 apparatus.

- 1) H<sub>2</sub>-TPR: 100 mg catalyst were pretreated in helium (99.999%) at 200 °C for 1 h, then placed in a dry ice-ethanol bath (-72 °C), switched to 5 vol.% H<sub>2</sub>/N<sub>2</sub> mixture and recorded baseline. The system was removed from the dry ice-ethanol bath and allowed to warm to room temperature (25 °C), followed by heating to 700 °C at rate of 10 °C/min, and the hydrogen consumption was recorded with a thermal conductivity detector.
- 2) CO-TPD: 100 mg catalyst were pretreated in helium (99.999%) at 200 °C for 1 h, then adsorbed CO for 1 h under a 5 vol.% CO/Ar mixture at -72 °C (dry ice-ethanol bath), followed by helium purging and baseline recording. Then the system was removed from the dry ice bath and allowed to warm to room temperature (25 °C), and the CO desorption was recorded with a thermal conductivity detector.

H/D exchanges was taken by a Dycor Dymaxion Mass Spectrometer (AMETEK Process Instruments). The as-prepared sample (100 mg) was pretreated under pure Ar (20 mL/min) at 200 °C for 1 h, and then cooled under the same atmosphere to -72°C (dry ice-ethanol bath). Introduce 10 vol.% H<sub>2</sub>/Ar into the system at this low-temperature for 1 h to enrich the surface of the sample with hydrogen. Subsequently, the atmosphere was switched to pure Ar to scavenge physically adsorbed H<sub>2</sub>, and the system was removed from the dry ice-ethanol bath under 10 vol.% D<sub>2</sub>/Ar and the HD signal was recorded while warming to room temperature.

### **Catalytic test**

The catalytic performances of all the samples for the selective hydrogenation of *o*-

Chloronitrobenzene (CNB) were evaluated under mild conditions in a 50 ml high-pressure autoclave with a magnetic stirrer (600 rpm). Typically, the reactant (CNB, 0.5 mL), catalyst (0.05 g), and solvent (ethanol, 10 mL) were mixed in the reactor, and then pure H<sub>2</sub> was introduced and kept at 8 bars, and the reaction system was heated to a given temperature (measured with a thermometer in the autoclave). After the reaction, solid catalyst was separated from the liquid products, and the reactant and products were analyzed by gas chromatography (GC9560) equipped with a flame ionized detector and an SE-54 column.

TOFs is defined as the number of converted molecular of reactant per hour per mole of Pt.

**Table S1** List of Pt/Al<sub>2</sub>O<sub>3</sub> catalyzes hydrogenations in the literature.

| Entry | Temp. (°C) | Conv. (%) | Sel. (%) | Ref.      |
|-------|------------|-----------|----------|-----------|
| 1     | 80         | 15.1      | >99      | 2         |
| 2     | 45         | 82.6      | 77.7     | 3         |
| 3     | 40         | 87.3      | 27.8     | 4         |
| 4     | 40         | 95.0      | 60.2     |           |
| 5     | 40         | 91.6      | 40.8     | 5         |
| 6     | 40         | 90.5      | 6.1      |           |
| 7     | 160        | 100       | 0        |           |
| 8     | 160        | 85        | 82       | 6         |
| 9     | 30         | >99       | >95      | this work |
| 10    | 60         | >98       | >99      | this work |

**Table S2** Platinum content and Brunauer–Emmett–Teller (BET) surface areas of typical catalysts

| Catalyst            | Pt content (wt.%) | A <sub>BET</sub> (m <sup>2</sup> /g) |
|---------------------|-------------------|--------------------------------------|
| A1                  | -                 | 154.5                                |
| Pt <sub>1</sub> /A1 | 0.78              | 150.1                                |
| Pt <sub>n</sub> /A1 | 0.75              | 151.2                                |
| A0                  | -                 | 249.8                                |

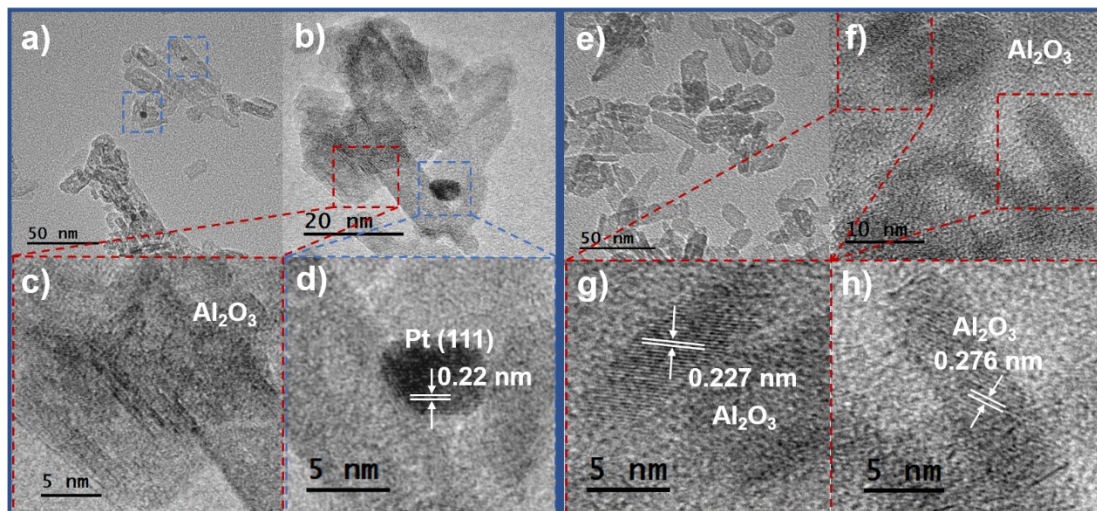

**Fig. S1** Morphologies of samples. HRTEM images of a-d)  $Pt_n/A1$  and e-h)  $Pt_1/A1$ .

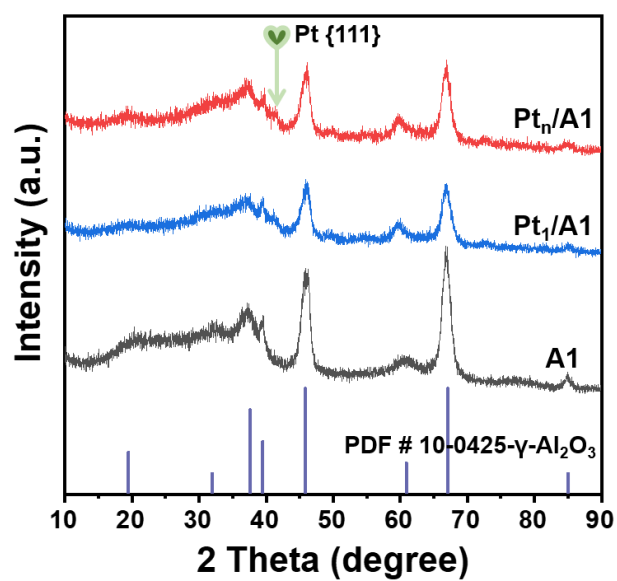

**Fig. S2** XRD patterns of typical samples (Pt: PDF # 04-0802)

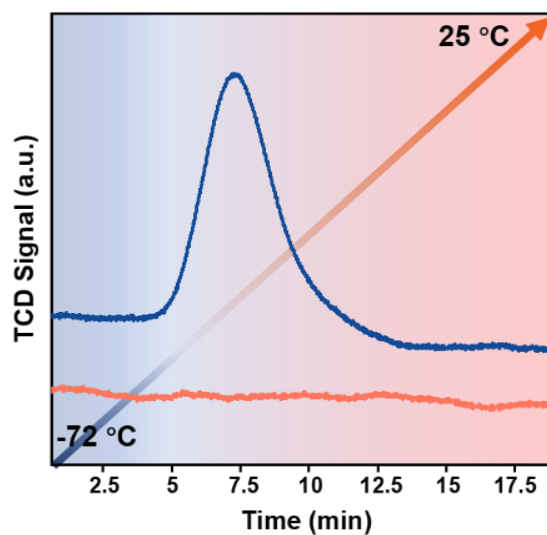

**Fig. S3** CO-TPD curves of samples, where the gradation of the image background from blue (left) to red (right) represents the rise in temperature.

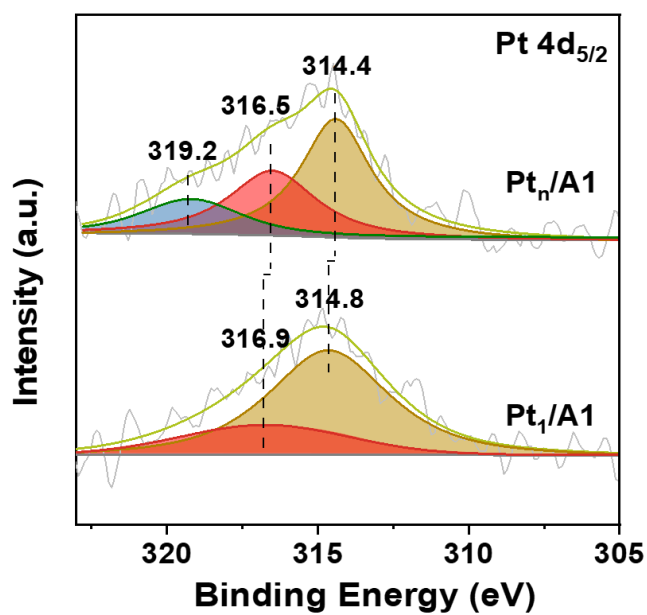

**Fig. S4** Pt 4d XPS spectra of the samples.



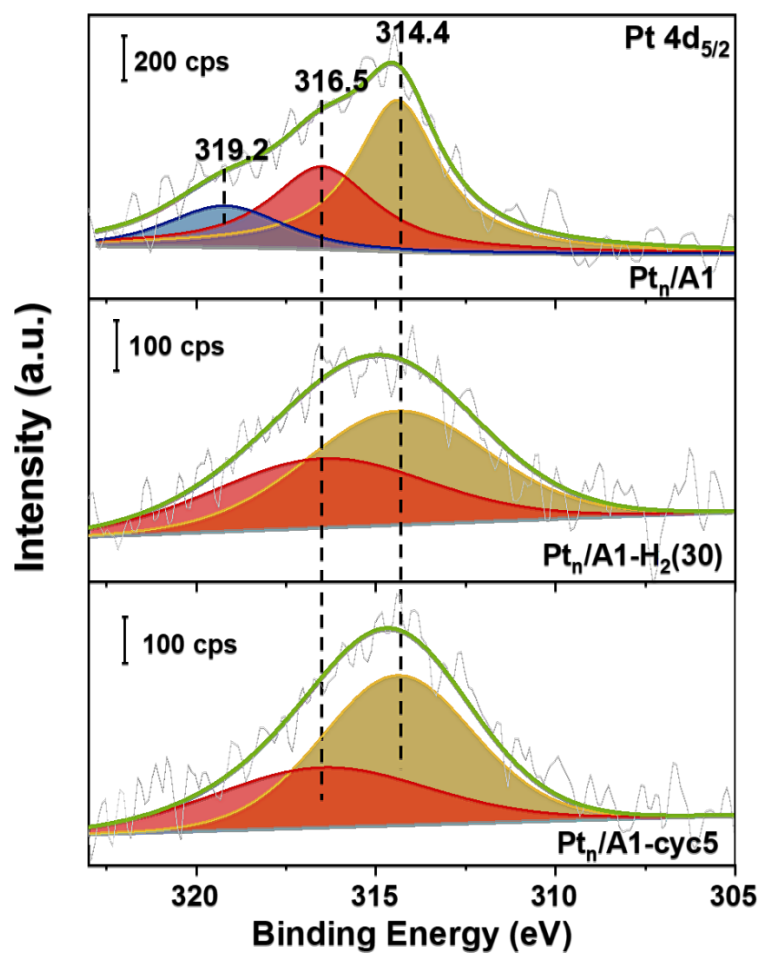

**Fig. S5** Pt 4d XPS spectra of the samples, where Pt<sub>n</sub>/A1-H<sub>2</sub>(30) indicates the sample of Pt<sub>n</sub>/A1 under 5 vol.% H<sub>2</sub>/N<sub>2</sub> treatment at 30 °C for 1h, and Pt<sub>n</sub>/A1-cyc5 indicates the sample of Pt<sub>n</sub>/A1 after the fifth cycle of *o*-chloronitrobenzene hydrogenation tests.

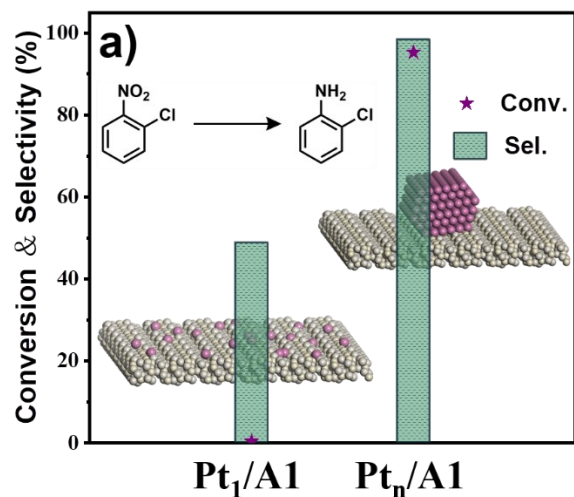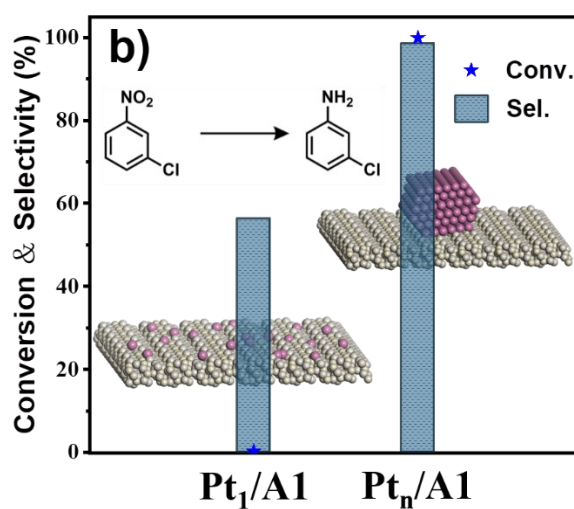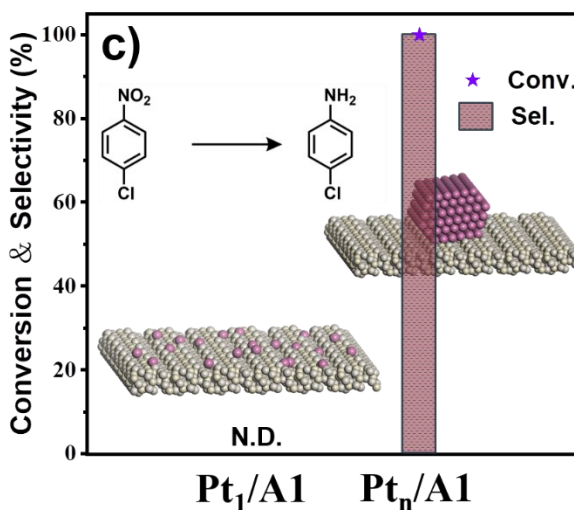

**Fig. S6** Hydrogenation performance of a) *ortho*-, b) *meta*-, c) *para*-chloronitrobenzene on Pt<sub>1</sub>/A1 and Pt<sub>n</sub>/A1. Reaction conditions: 0.05 g catalyst, 0.5 g substrate, 10 mL ethanol, 8 bar H<sub>2</sub>, 1 h, 30 °C.

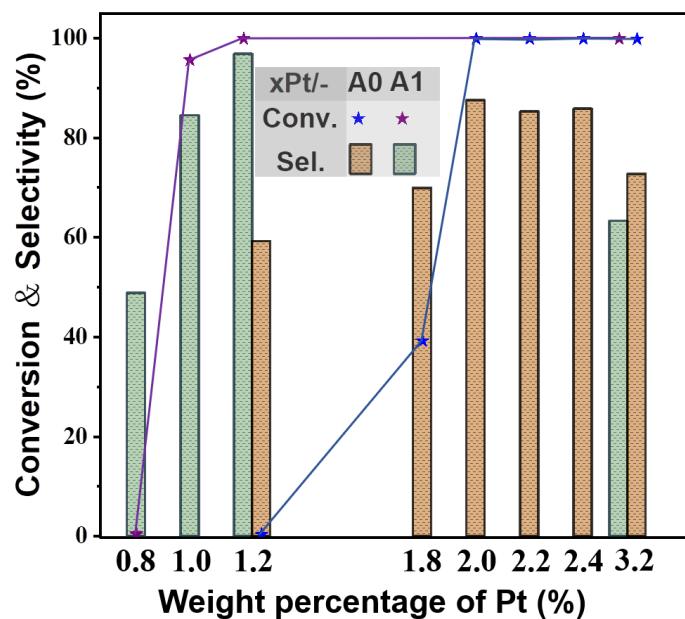

**Fig. S7** Hydrogenation performance of *o*-CNB over xPt/A0 and xPt/A1 catalysts, where “x” represents the percentage of Pt mass content. Except for *o*-CAN, the other products are nitrobenzene and aniline. Reaction conditions: 0.05 g Cat., 0.5 g *o*-CNB, 10 mL ethanol, 8 bar H<sub>2</sub>, 1 h, 60 °C.

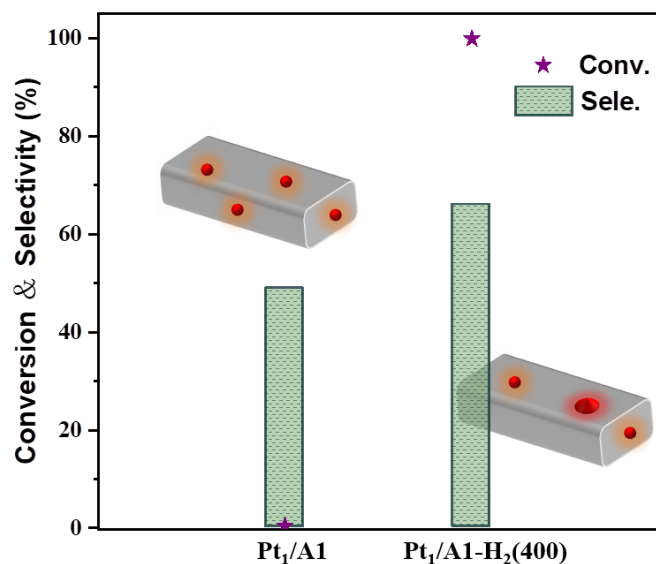

**Fig. S8** Hydrogenation performance of *o*-CNB to *o*-CAN, where Pt<sub>1</sub>/A1-H<sub>2</sub>(400) indicates the sample of Pt<sub>1</sub>/A1 under 5 vol.% H<sub>2</sub>/N<sub>2</sub> treatment at 400 °C for 1h.

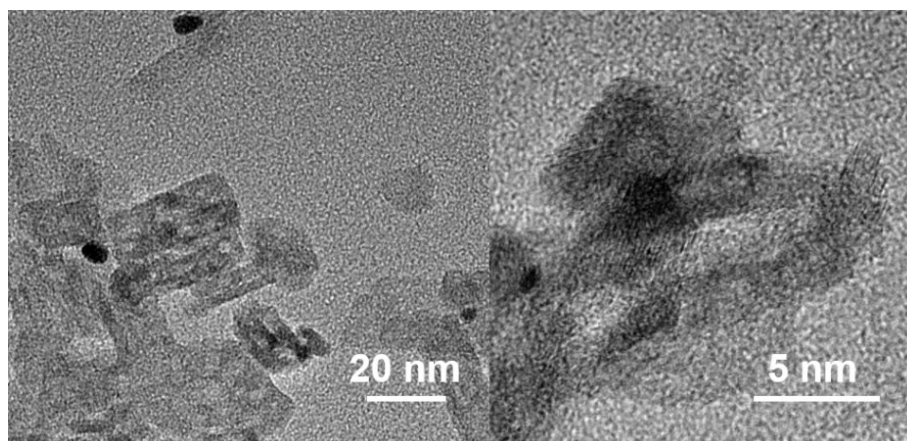

**Fig. S9** HRTEM images of sample 3.2Pt/A1, in which irregularly shaped and unevenly sized particles were formed.

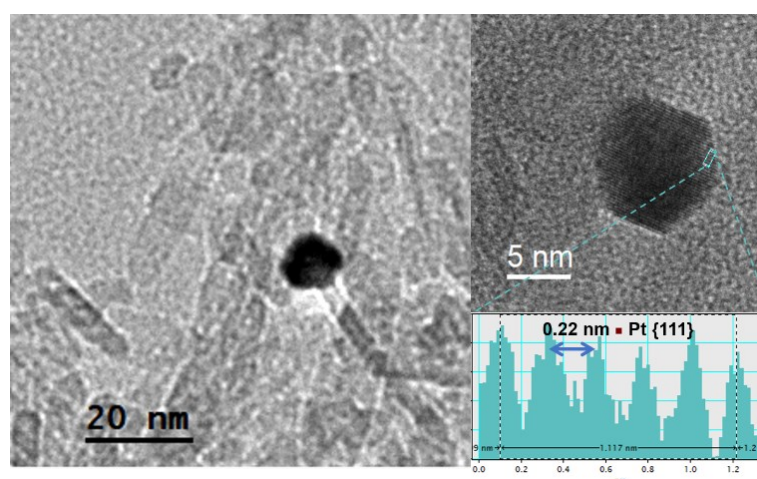

**Fig. S10** HRTEM images of Pt<sub>1</sub>/A1-H<sub>2</sub>(400), of which the big size Pt particles formed.

## References

- 1 W. Cai, S. Zhang, J. Lv, J. Chen, J. Yang, Y. Wang, X. Guo, L. Peng, W. Ding, Y. Chen, Y. Lei, Z. Chen, W. Yang and Z. Xie, *ACS Catalysis*, 2017, 7, 4083-4092.
- 2 Y. Zhang and J. Zhou, *Journal of Catalysis*, 2021, 395, 445-456.
- 3 M. Liu, W. Tang, Z. Xie, H. Yu, H. Yin, Y. Xu, S. Zhao and S. Zhou, *ACS Catalysis*, 2017, 7, 1583-1591.
- 4 H. Wei, X. Liu, A. Wang, L. Zhang, B. Qiao, X. Yang, Y. Huang, S. Miao, J. Liu and T. Zhang, *Nature Communications*, 2014, 5, 5634.
- 5 A. Corma, P. Serna, P. Concepción and J. J. Calvino, *Journal of the American Chemical Society*, 2008, 130, 8748-8753.
- 6 K.-I. Shimizu, Y. Miyamoto, T. Kawasaki, T. Tanji, Y. Tai and A. Satsuma, *The Journal of Physical Chemistry C*, 2009, 113, 17803-17810.
